# Supplementary material for: Hemagglutinin Subtype Specificity and Mechanisms of Highly Pathogenic Avian Influenza Virus Genesis
Source: MDPI journal article supplement (doi:10.3390/v14071566), 2022-07-19
Supplement: s1 [file s1]

**Supplementary Table S1: Overview of AIV passaging experiments that focus on MBCS acquisition and virulence gain.**

| Viral strain (I/R <sup>a</sup> )                                                     | Starting CS sequence                          | Methods                                                                                                                                                                           | Results                                                                                                                                                                                       | CS changes <sup>b</sup>                                                                                                                                                 | Ref.  |
|--------------------------------------------------------------------------------------|-----------------------------------------------|-----------------------------------------------------------------------------------------------------------------------------------------------------------------------------------|-----------------------------------------------------------------------------------------------------------------------------------------------------------------------------------------------|-------------------------------------------------------------------------------------------------------------------------------------------------------------------------|-------|
| A/chicken/New Jersey/12508/1986 H5N2 (I)<br>A/chicken/Florida/27716-2 /1986 H5N2 (I) | PQKKKR (CCT CAG AAG AAA AAG AGA)              | A) plaque selection in CEF <sup>c</sup> without trypsin (1 or 2 cycles).<br>B) 1 passage of trypsin-independent viruses from plaque selection in chickens.                        | A) plaque formation without trypsin.<br>B) decrease in MDT <sup>d</sup> , increase in in vivo mortality.                                                                                      | No sequencing performed.                                                                                                                                                | [213] |
| A/chicken/Pennsylvania/1/1983 H5N2 (I)                                               | PQKKKR (CCT CAG AAG AAA AAG AGA)              | 9-10 passages on CEC <sup>e</sup> cells, alternately with and without trypsin and plaque selection (3 cycles).                                                                    | Trypsin-independency.                                                                                                                                                                         | HQRKKR (CAT CAG AGG AAA AAG AGA)<br>PKKKKR (CCT AAG AAG AAA AAG AGA)<br>PRKKKR (CCT CGG AAG AAA AAG AGA)<br>HQRKKR (CAT CAG AGG AAA AAG AGA)                            | [172] |
| A/turkey/Oregon/1971 H7N3 (I)                                                        | PENPKTR (CCG GAA AAT CCA AAG ACT AGA)         | 12 passages on CEC, alternately with and without trypsin.                                                                                                                         | Trypsin-independency and pathogenic for chickens.                                                                                                                                             | Insertion of 24nts <sup>f</sup> at CS (28S rRNA).                                                                                                                       | [214] |
| A/turkey/Oregon/1971 H7N3 (I)                                                        | PENPKTR (CCG GAA AAT CCA AAG ACT AGA)         | A) 7 passages in MDCK without trypsin and plaque purification (4 cycles).<br>B) 52 passages on CEC, alternately with and without trypsin. Plaque selection and more CEC passages. | A) trypsin-independency in MDCK, not in CEC. Not pathogenic in chickens.<br>B) trypsin-independency and pathogenic for chickens.                                                              | A) no changes.<br>B) 4 variants with insertion of 24nts at CS (28S rRNA). Variant 1 is described in [211]                                                               | [215] |
| A/seal/Mass/1/1980 H7N7 (I)                                                          | PENPKTR*G (CCA GAG AAT CCA AAG ACC AGA * GGA) | A) 7-10 passages in MDCK without trypsin.<br>B) 32-35 passages in CEC, alternately with and without trypsin.                                                                      | A) trypsin-independency in MDCK, not in other cell types. Not pathogenic in chickens. B) modest trypsin-independency at p20. At p32 and p35 trypsin-independency and pathogenic for chickens. | A) no changes.<br>B) passage 32 PENPKTRGRR* G (CCA GAG AAT CCA AAG ACC AGA GGA CGG AGG * GGG); passage 35 PENPKTRRRR* G (CCA GAG AAT CCA AAG ACC AGA AGA CGG AGG * GGG) | [216] |
| A/chicken/Pennsylvania/215/1983 H5N2 (I)                                             | PQKKKR (CCT CAG AAG AAA AAG AGA)              | Cloning in CEF and 2-4 passages in chickens.                                                                                                                                      | Trypsin-independency and pathogenic for chickens.                                                                                                                                             | No sequencing performed.                                                                                                                                                | [204] |
| A/seal/Mass/1/1980 H7N7 (I)                                                          | PENPKTR*G (CCA GAG AAT CCA AAG ACC AGA * GGA) | Passaging in CEC (5x with thermolysin, 1x with trypsin, 1x without proteases).                                                                                                    | Trypsin-independency.                                                                                                                                                                         | Insertion of 60nts at CS (NP).                                                                                                                                          | [164] |

|                                                           |                                         |                                                                                                                                                      |                                                                                                                                                                                                                            |                                                                                                     |               |
|-----------------------------------------------------------|-----------------------------------------|------------------------------------------------------------------------------------------------------------------------------------------------------|----------------------------------------------------------------------------------------------------------------------------------------------------------------------------------------------------------------------------|-----------------------------------------------------------------------------------------------------|---------------|
| 1) A/chicken/Pennsylvania/<br>21525/1983 H5N2 (I)         | 1) PQKKKR (AAG AAA AAG<br>AGA)          | 3 passages of AF <sup>8</sup> in 10do <sup>h</sup> or<br>14do ECE.                                                                                   | 1) in 14do ECE: trypsin-independency and<br>pathogenic for chickens. 2) no changes.                                                                                                                                        | 1) loss of GS p22 <sup>i</sup> .<br>2) no sequencing performed.                                     | [205]         |
| 2) A/turkey/Minnesota/1550<br>/1981 H5N2 (I)              | 2) RETR                                 |                                                                                                                                                      | 3) in 14do ECE: trypsin-independency.                                                                                                                                                                                      | 3) loss of GS p22.                                                                                  |               |
| 3) A/environment/<br>Pennsylvania/937302/1993<br>H5N2 (I) | 3) RKTR (AGA AAA ACA<br>AGA)            |                                                                                                                                                      | 4a) in 14do ECE: trypsin-independency.                                                                                                                                                                                     | 4a) PQRKKR (AGA AGA AAA AAA AGA)                                                                    |               |
| 4) A/turkey/Ontario/7732/<br>1966 H5N9 (R)                | 4a) PQRKKR (AGA AAA<br>AAA AGA)         |                                                                                                                                                      | 4b) no changes.                                                                                                                                                                                                            | 4b) no sequencing performed.                                                                        |               |
| A/emu/TX/39924/1993<br>H5N2 (I)                           | PQRKTR (AGA AAA ACA<br>AGA)             | 1 passage in 14do ECE and 2<br>passages in chickens (spleen).                                                                                        | Trypsin-independency and pathogenic for<br>chickens.                                                                                                                                                                       | PQRKRKTR (AGA AAA AGA AAA ACA AGA)                                                                  | [206]         |
| A/whistling swan/Shimane/<br>499/1983 H5N3 (I)            | RETR (AGA GAA ACA<br>AGA)               | A) 18 passages in chicken air<br>sacs.<br>B) 24 passages in chicken air<br>sacs.<br>C) 24 passages in chicken air sacs<br>and 3-5 passages in brain. | A) viral antigen present in endothelial<br>cells of 3do chicks. No mortality upon IN <sup>j</sup><br>inoculation chickens.<br>B) more antigen present in 3do chicks. No<br>mortality IN.<br>C) high mortality chickens IN. | A) RETR<br>B) REKR (AGA GAA AAA AGA)<br>C) RRKKR (AGA AGA AAA AAA AGA)                              | [196,207,208] |
| 1) A/chicken/NewJersey<br>/12508/1986 H5N2 (I)            | PQKKKR (CCT CAG AAG<br>AAA AAG AGA)     | A) cloning in CEF.<br>B) 1/2 passages in chickens.<br>C) cloning in CEF and passaging<br>in chickens.<br>D) 1 passage in 14do ECE.                   | 1/2A) unsuccessful.<br>1/2B) trypsin-independency and<br>pathogenic for chickens.<br>3C) trypsin-independency and pathogenic<br>for chickens. 3D) Trypsin-independency<br>and pathogenic for chickens.                     | No sequencing performed.                                                                            | [209]         |
| 2) A/chicken/Florida/27716<br>/1986 H5N2 (I)              |                                         |                                                                                                                                                      |                                                                                                                                                                                                                            |                                                                                                     |               |
| 3) A/chicken/Pennsylvania<br>/21525/1983 H5N2 (I)         |                                         |                                                                                                                                                      |                                                                                                                                                                                                                            |                                                                                                     |               |
| A/chicken/Taiwan<br>/K703-1/2008 H5N2 (I)                 | PQRKKR (CCC CAA AGG<br>AAA AAA AGA)     | 4 passages in air sacs chicks and<br>4 passages in chickens.                                                                                         | Starting AIV was trypsin-independent,<br>increased pathogenicity.                                                                                                                                                          | No changes.                                                                                         | [175]         |
| 1) A/chicken/Yokohama<br>/aq-55/2001 H9N2 (R)             | 1) PARKKR (CCT GCT AGA<br>AAA AAG AGA)  | Passaging in air sacs chicks.                                                                                                                        | 1) trypsin-independent and moderately<br>pathogenic.<br>2a) increased virulence at passage 3.<br>2b) increased virulence at passage 3.                                                                                     | 1) loss of GS p22.<br>2a) PRRRKKR (CCT CGA AGA AGA AAA<br>AAA AGA) at passage 1.<br>2b) no changes. | [173]         |
| 2) A/duck/Hokkaido/Vac-1<br>/2004 H5N1 (R)                | 2a) PRRKKR (CCT CGA<br>AGA AAA AAA AGA) |                                                                                                                                                      |                                                                                                                                                                                                                            |                                                                                                     |               |

|                                 |                                                                                                                                                                                                                                                                                                                                                                                                                                                                                                                                                                                                                                                                                                                                                         |                                                                                                                                                                               |                                                                      |                                                                                                                                                                                                                                                                                                                                                                                                                                                                                                                                                          |       |
|---------------------------------|---------------------------------------------------------------------------------------------------------------------------------------------------------------------------------------------------------------------------------------------------------------------------------------------------------------------------------------------------------------------------------------------------------------------------------------------------------------------------------------------------------------------------------------------------------------------------------------------------------------------------------------------------------------------------------------------------------------------------------------------------------|-------------------------------------------------------------------------------------------------------------------------------------------------------------------------------|----------------------------------------------------------------------|----------------------------------------------------------------------------------------------------------------------------------------------------------------------------------------------------------------------------------------------------------------------------------------------------------------------------------------------------------------------------------------------------------------------------------------------------------------------------------------------------------------------------------------------------------|-------|
|                                 | 2b) PQRERRKKR (CCT CAA<br>AGA GAA AGA AGA AAA<br>AAG AGA)                                                                                                                                                                                                                                                                                                                                                                                                                                                                                                                                                                                                                                                                                               |                                                                                                                                                                               |                                                                      |                                                                                                                                                                                                                                                                                                                                                                                                                                                                                                                                                          |       |
| A/Vietnam/1203/2004 H5N1<br>(R) | 1) NSPQRERR-<br>RKKR (aat agc cct caa aga gag<br>aga aga aga aaa aag aga)<br>2) PQRETR (aat agc cct caa<br>aga gag acg aga)<br>3) PQREKR (aat agc cct caa<br>aga gag aag aga)<br>4) PQRKTR (aat agc cct caa<br>aga aaa acg aga)<br>5) PQRKKR (aat agc cct caa<br>aga aaa aag aga)<br>6) PQRERKKR (aat agc cct<br>caa aga gag aga aaa aa gaga)<br>7) PQRKKR (aat agc cct caa<br>aga aga aaa aag aga)<br>8) PQRERRKKR (aat agc cct<br>caa aga gag aga aga aaa aag<br>aga)<br>9) PQRERRRKTR (aat agc cct<br>caa aga gag aga aga aga aaa acg<br>aga)<br>10) PQRERRQKKR (aat agc<br>cct caa aga gag aga aga caa aaa<br>aag aga)<br>11) NVPQRERRRKKR (aat<br>gtc cct caa aga gag aga aga aga<br>aaa aag aga)<br>12) RETR (aat agc cct caa aga<br>gag acg aga) | 1-11) ONO <sup>k</sup> inoculation of<br>chickens, sequencing of<br>brain/lung tissue with Sanger.<br>12/13) IV <sup>l</sup> inoculation of<br>chickens, sequencing of brain. | 1,2,6-9,11,12) Genetically stable<br>3-5,10,13) Genetically unstable | 1,2,6-9,11,12) no changes.<br>3) NSLRREKR (aat agc ctt cga aga gag aag aga),<br>NSHQREKR (aat agc cat caa aga gag aag aga)<br>4) NSPQRKKRTR (aat agc cct caa aga aaa <i>aga</i><br><i>aaa</i> acg aga)<br>5) NSPQRKKR (aat agc cct caa aga <i>aga</i> aaa<br>aag aga)<br>10) RERRRKKR (aat agc cct caa aga gag aga<br>aga cga aaa aag aga), RERRLKKR (aat agc cct<br>caa aga gag aga aga cta aaa aag aga),<br>RKRRQKKR (aat agc cct caa aga aag aga aga<br>caa aaa aag aga)<br>13) NSPQRKKRTR (aat agc cct caa aga aaa <i>aga</i><br><i>aaa</i> acg aga) | [165] |

|                                                                                                       |                                                                                       |                                                                                                                                                                        |                                                                                                                  |                                                                                                                                                   |       |
|-------------------------------------------------------------------------------------------------------|---------------------------------------------------------------------------------------|------------------------------------------------------------------------------------------------------------------------------------------------------------------------|------------------------------------------------------------------------------------------------------------------|---------------------------------------------------------------------------------------------------------------------------------------------------|-------|
|                                                                                                       | 13) RKTR (aat agc cct caa aga<br>aaa acg aga)                                         |                                                                                                                                                                        |                                                                                                                  |                                                                                                                                                   |       |
| 1) A/ostrich/South Africa<br>/ORD/2012 H7N1 (I)<br>2) A/ostrich/South Africa<br>/325863/2015 H5N2 (I) | 1) PELPKGR (CCC GAA<br>CTC CCA AAG GGA AGA)<br>2) PQRETR (CCT CAA AGA<br>GAG ACA AGA) | Passaging in ECE (passage 1-7<br>AF, passage 8-17 AF and<br>embryo).                                                                                                   | Increased ECE mortality and decreased<br>MDT.                                                                    | No consensus changes, but very low frequencies<br>of CS variants such as recombination with NP in<br>virus (2).                                   | [210] |
| A/chicken/England/11406/20<br>08 H7N7 (R)                                                             | 1) PEIPKKR (CCA AAG AAA<br>AGA)<br>2) PEIPKGR (CCA AAG GGA<br>AGA)                    | A) 10 passages of AF in 14do<br>ECE.<br>B) 1 passage in 9do or 14do ECE,<br>AIV selection in embryonic<br>tissue.<br>C) 3 passages of embryonic tissue<br>in 14do ECE. | A) no changes.<br>B/C) selection of variants with LP/HP<br>mixed phenotype.                                      | 1A) no changes.<br>1B) PEIPKKKKR and PEIPKRKKR (no<br>nucleotide sequences available).<br>2B) no changes. 2C) no changes.                         | [211] |
| A/whistling<br>swan/Shimane/499/1983<br>H5N3 (R)                                                      | 1) PQRKKR (AGA AAA AAA<br>AGA)<br>2) PQRKKR (CGC AAG AAG<br>AGA)                      | A) single passage in MDCK<br>without trypsin.<br>B) intracerebral passage in<br>chicks.                                                                                | 1A) plaque formation without trypsin.<br>2A) no plaque formation.<br>1B) increased mortality.<br>2B) no changes. | 1A) RKKRKKR (AGA AAA AAA AGA AAA<br>AAA AGA), RKKR (AGA AGA AAA AAA<br>AGA)<br>1B) RKKRKKR (AGA AAA AAA AGA AAA<br>AAA AGA).<br>2A/B) no changes. | [212] |

<sup>a</sup> I/R: the stock used for the passaging experiments was an isolate (I) or recombinant virus produced through reverse genetics (R).

<sup>b</sup> Inserted nucleotides have been indicated in italics.

<sup>c</sup> CEF: chicken embryonic fibroblasts.

<sup>d</sup> MDT: mean death time.

<sup>e</sup> CEC: chicken embryonic cells.

<sup>f</sup> nts: nucleotides.

<sup>g</sup> AF: allantoic fluid.

<sup>h</sup> ndo ECE: n-day-old embryonated chicken eggs.

<sup>i</sup> GS p22: putative glycosylation site p22 (H3 numbering).

<sup>j</sup> IN: intranasal.

<sup>k</sup> ONO: oronasal-ocular.

<sup>l</sup> IV: intravenous.

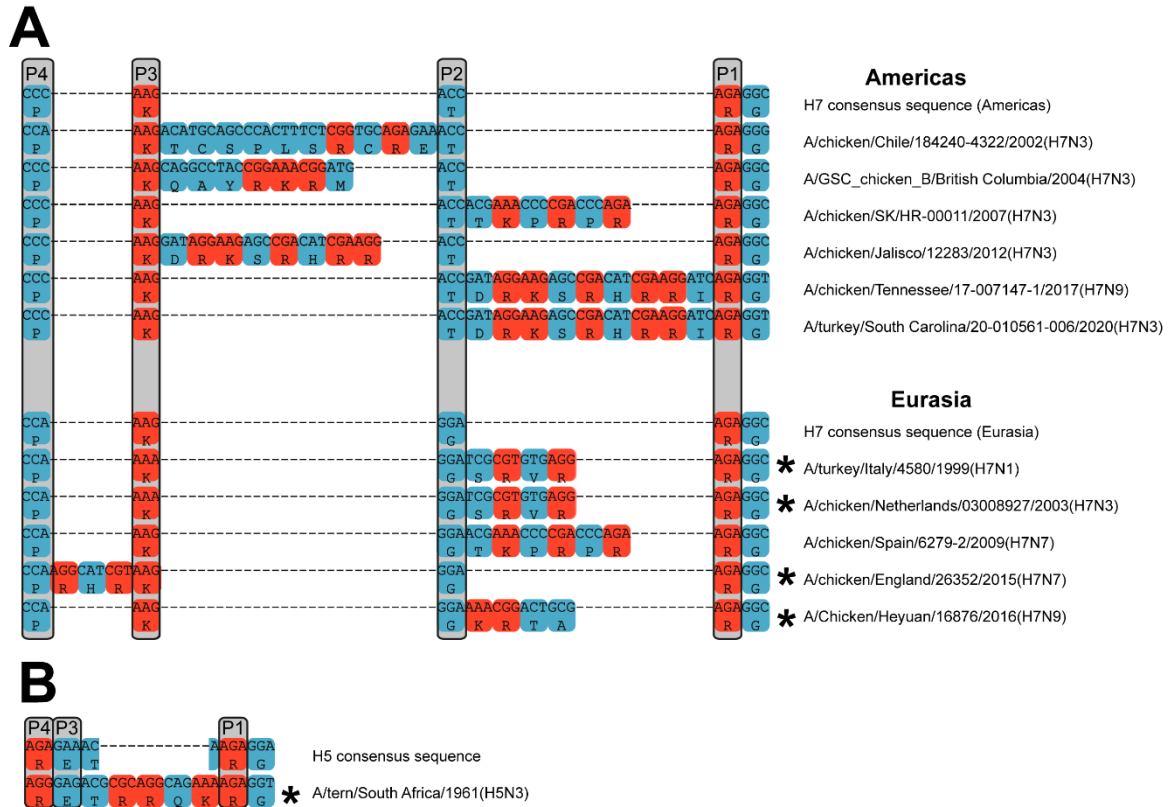

**Supplementary Figure S1: Alternative alignments of MBCS-containing H5 and H7 AIVs that propose NHR as the mechanism of MBCS acquisition.** Nucleotide and amino acid alignments of H7 (A) and H5 (B) MBCS-containing AIVs that are considered to be confirmed or putative (indicated by an asterisk) cases of NHR. The grey boxes delineate conserved amino acids from the LPAI consensus sequence with P1 to P4 indicated on top. Arginines and lysines are depicted in red and all other amino acids are depicted in blue.
